# Supplementary material
Source: MDPI journal article supplement (https://www.mdpi.com/2311-7524/9/1/34)
Supplement: s1 [file s1]

Archive with 7 entries (7 files):
- 2022-10-08 Table S1.pdf
- 2022-10-08 Table S2.pdf
- 2022-10-08 Table S3.pdf
- 2022-10-09 Table S4.pdf
- 2022-10-09 Table S5.pdf
- Figure S1 legend.pdf
- Figure S1.jpg
