# Supplementary material
Source: MDPI journal article supplement (https://www.mdpi.com/2311-7524/9/1/34)
Supplement: s1 [file s1 › 2022-10-08 Table S1.pdf]

**Table S1 Primers used in the present study**

| Primers ID      | Primer sequence (5' to 3')  | Gene          |
|-----------------|-----------------------------|---------------|
| <i>TG294-F</i>  | attggctgcaatgatggatt        | <i>CEL5</i>   |
| <i>TG294-R</i>  | ctaagcaggacggccatcta        |               |
| <i>ACTIN-F</i>  | ttgctgaccgtatgagcaag        | <i>ACTIN</i>  |
| <i>ACTIN-R</i>  | ggacaatggatggaccagac        |               |
| <i>DXS-F</i>    | aagaggaaatgggatcggtgta      | <i>DXS</i>    |
| <i>DXS-R</i>    | agccactctctccccctcaa        |               |
| <i>DXR-F</i>    | cttaggcgcattatattaactgcat   | <i>DXR</i>    |
| <i>DXR-R</i>    | gtggcagaatcaacagtaatctttt   |               |
| <i>HDR-F</i>    | cgggatgcctaaggctaaactcc     | <i>HDR</i>    |
| <i>HDR-R</i>    | ctggtcagattcttcg            |               |
| <i>IDII-F</i>   | ccaatataaggggagaagcagaag    | <i>IDII</i>   |
| <i>IDII-R</i>   | ggaaacggcaacggagagag        |               |
| <i>PSYI-F</i>   | tggcccaaacgcatcatata        | <i>PSYI</i>   |
| <i>PSYI-R</i>   | caccatcgagcatgtcaaatg       |               |
| <i>CRTISO-F</i> | tttggcggaatcaactacc         | <i>CRTISO</i> |
| <i>CRTISO-R</i> | gaaagcttcgctccacag          |               |
| <i>LCYE-F</i>   | actggatttagtggaatcggctgt    | <i>LCYE</i>   |
| <i>LCYE-R</i>   | agttgtttgtgaaaggaagatcagg   |               |
| <i>CYCB-F</i>   | tgttattgaggaagagaaatgtgtgat | <i>CYCB</i>   |
| <i>CYCB-R</i>   | tcccaccaatagccataacatttt    |               |

Note: *ACTIN* (*Solyc03g078400*) was used as reference gene in present study.
