# Supplementary material
Source: MDPI journal article supplement (https://www.mdpi.com/2311-7524/9/1/34)
Supplement: s1 [file s1 › 2022-10-08 Table S2.pdf]

Table S2 Phenotypic traits of tomato with different genetic backgrounds

| number | traits | e9292(pistillate parent ) | LA158(pollen parent) | F <sub>1</sub> (e9292xLA1585) | F <sub>2</sub> generation |                     |                     |                     |                     |                     |                     |                     |                     |                     |
|--------|--------|---------------------------|----------------------|-------------------------------|---------------------------|---------------------|---------------------|---------------------|---------------------|---------------------|---------------------|---------------------|---------------------|---------------------|
|        |        |                           |                      |                               | F <sub>2</sub> -253       | F <sub>2</sub> -259 | F <sub>2</sub> -266 | F <sub>2</sub> -280 | F <sub>2</sub> -292 | F <sub>2</sub> -299 | F <sub>2</sub> -318 | F <sub>2</sub> -328 | F <sub>2</sub> -330 | F <sub>2</sub> -332 |
| 001    | P1     | 2                         | 1                    | 1                             | 1                         | 1                   | 1                   | 1                   | 1                   | 1                   | 1                   | 1                   | 1                   | 1                   |
| 002    | P2     | 2                         | 1                    | 1                             | 1                         | 1                   | 2                   | 1                   | 1                   | 2                   | 2                   | 2                   | 1                   | 2                   |
| 003    | L1     | 2                         | 1                    | 2                             | 1                         | 1                   | 1                   | 1                   | 1                   | 1                   | 1                   | 1                   | 2                   | 1                   |
| 004    | L2     | 3                         | 2                    | 2                             | 2                         | 2                   | 2                   | 2                   | 2                   | 2                   | 2                   | 2                   | 2                   | 2                   |
| * 005  | L3     | 3                         | 3                    | 3                             | 3                         | 3                   | 3                   | 3                   | 3                   | 3                   | 3                   | 3                   | 3                   | 3                   |
| 006    | L4     | 0                         | 0                    | 0                             | 0                         | 0                   | 0                   | 0                   | 0                   | 0                   | 0                   | 0                   | 0                   | 0                   |
| 007    | L5     | 3                         | 1                    | 2                             | 1                         | 2                   | 1                   | 1                   | 1                   | 3                   | 1                   | 2                   | 3                   | 1                   |
| 008    | gh     | 1                         | 1                    | 1                             | 3                         | 1                   | 3                   | 3                   | 1                   | 3                   | 3                   | 3                   | 3                   | 3                   |
| 009    | F1     | 2                         | 2                    | 2                             | 2                         | 2                   | 2                   | 2                   | 2                   | 2                   | 2                   | 2                   | 2                   | 2                   |
| 010    | F2     | 0                         | 0                    | 0                             | 0                         | 0                   | 0                   | 0                   | 0                   | 0                   | 0                   | 0                   | 0                   | 0                   |
| 011    | F3     | 2                         | 2                    | 2                             | 2                         | 2                   | 2                   | 2                   | 2                   | 2                   | 2                   | 2                   | 2                   | 2                   |
| 012    | F4     | 1                         | 1                    | 1                             | 1                         | 1                   | 1                   | 1                   | 1                   | 1                   | 1                   | 1                   | 1                   | 1                   |
| 013    | F5     | 1                         | 3                    | 3                             | 2                         | 3                   | 3                   | 3                   | 3                   | 1                   | 1                   | 2                   | 1                   | 3                   |
| 014    | Fr1    | 2                         | 4                    | 4                             | 2                         | 4                   | 2                   | 4                   | 4                   | 2                   | 4                   | 2                   | 2                   | 4                   |

[illegible]

|     |          |            |            |            |            |            |            |            |            |            |            |            |            |            |
|-----|----------|------------|------------|------------|------------|------------|------------|------------|------------|------------|------------|------------|------------|------------|
| 033 | F15(mm)  | 10.72±2.56 | 6.34±0.15  | 6.71±0.15  | 8.33±1.14  | 8.15±0.51  | 6.83±1.19  | 7.00±0.85  | 7.31±1.07  | 5.47±0.32  | 6.14±0.76  | 7.18±0.44  | 7.62±0.97  | 6.35±0.29  |
| 034 | Fr7 (g)  | 42.25±6.42 | 1.23±0.07  | 6.53±0.70  | 10.64±1.58 | 14.39±2.17 | 7.93±1.97  | 8.31±0.27  | 7.10±0.88  | 5.39±0.97  | 9.74±1.18  | 8.33±1.00  | 4.90±0.96  | 8.43±0.97  |
| 035 | Fr8 (mm) | 6.41±0.87  | 1.21±0.08  | 3.25±0.08  | 3.72±0.22  | 4.55±0.22  | 3.01±0.38  | 2.80±0.30  | 2.86±0.24  | 2.90±0.14  | 3.15±0.05  | 3.57±0.24  | 2.54±0.50  | 3.43±0.52  |
| 036 | Fr9(mm)  | 45.98±2.75 | 12.34±0.57 | 22.5±1.19  | 24.69±0.60 | 30.35±1.57 | 24.62±2.77 | 23.93±0.54 | 23.20±1.21 | 22.29±1.03 | 24.90±0.69 | 24.20±1.01 | 20.98±1.86 | 25.13±1.18 |
| 037 | Fr10(mm) | 42.10±3.33 | 13.57±0.29 | 22.94±1.08 | 27.70±1.58 | 30.93±2.16 | 24.59±1.67 | 25.25±0.37 | 23.20±1.07 | 21.16±1.69 | 26.69±0.83 | 25.75±1.53 | 20.63±1.44 | 24.51±1.18 |
| 038 | Fr11     | 1.10±0.10  | 0.91±0.03  | 0.98±0.03  | 0.89±0.04  | 0.98±0.03  | 1.00±0.06  | 0.95±0.02  | 1.00±0.04  | 1.06±0.05  | 0.93±0.02  | 0.94±0.08  | 1.02±0.03  | 1.03±0.01  |
| 039 | Fr12     | 2.60±0.55  | 2.00±0.00  | 2.00±0.00  | 2.00±0.00  | 2.00±0.00  | 2.00±0.00  | 2.00±0.00  | 2.00±0.00  | 2.00±0.00  | 2.00±0.00  | 2.00±0.00  | 2.00±0.00  | 2.00±0.00  |
| 040 | Fr13(mm) | 9.69±0.40  | 9.17±0.43  | 11.81±0.12 | 9.41±0.87  | 11.70±0.30 | 9.53±0.73  | 10.38±0.72 | 11.13±1.05 | 9.49±0.88  | 11.91±0.33 | 11.00±1.13 | 9.92±1.09  | 11.83±0.87 |
| 041 | S1(mm)   | 3.80±0.06  | 3.37±0.09  | 2.94±0.08  | 3.94±0.16  | 3.59±0.18  | 3.70±0.10  | 3.48±0.08  | 3.21±0.16  | 3.49±0.21  | 3.36±0.13  | 3.35±0.08  | 3.53±0.14  | 3.38±0.08  |
| 042 | S2(mm)   | 2.86±0.03  | 2.09±0.04  | 2.17±0.08  | 2.91±0.08  | 2.59±0.12  | 2.44±0.11  | 2.41±0.03  | 2.46±0.06  | 2.48±0.08  | 2.55±0.04  | 2.25±0.09  | 2.48±0.12  | 1.97±0.14  |
| 043 | S3(mm)   | 0.76±0.02  | 0.59±0.01  | 0.61±0.03  | 0.71±0.02  | 0.81±0.05  | 0.60±0.02  | 0.62±0.02  | 0.72±0.05  | 0.66±0.03  | 0.63±0.02  | 0.62±0.01  | 0.63±0.02  | 0.58±0.05  |
| 044 | S4 (g)   | 2.89±0.06  | 0.94±0.03  | 2.02±0.05  | 2.74±0.04  | 1.59±0.04  | 2.79±0.03  | 2.18±0.04  | 1.71±0.03  | 2.12±0.05  | 2.33±0.05  | 2.23±0.01  | 1.76±0.02  | 1.99±0.07  |

Note: The figures of qualitative traits were derived from ten independent observations for each trait. Data of quantitative traits was derived from the ten biological replicates in the table, and presented into mean ± sd (standard deviation). \*, the yellow-highlighted lines in the table did not have polymorphic phenotypes.

**P: plant:** **p1**, plant type, 1-vine, 2- semi-vine, 3-straight; **p2**, growth type, 1-indeterminate, 2-determinate; **p3**, plant height (cm); **p4**, stem diameter (mm). **L. leaves:** **L1**, leaf shape, 1- simple odd-pinnately compound leaf, 2- bipinnate odd-pinnately compound leaf; **L2**, leaf attitude, 1-semi-erect, 2-horizontal, 3-drooping; **L3**, leaf color, 1-yellow green, 2-pale green, 3-green, 4-deep green; **L4**, leaf vein color, 0-clear, 1-purple, 2-green; **L5**, leaf division, 0-none, 1- lobate, 3- parted, 4- divided; **L6**, leaf length (cm); **L7**, leaf width (cm); **gh**, glandular hairs on the leaves or steams, 0-none, 1-thin short, 2-thick short , 3-thin long, 4-thick long. **F: flower:** **f1**, inflorescence type, 1-solitary flower, 2-generally uniparous, 3-both partly uniparous and multiparous, 4-generally multiparous; **f2**, flower cluster, 0-absent, 1-present; **f3**, corolla color, 1-light yellow, 2-yellow, 3-orange; **f4** pedicel abscission layer, 0-absent, 1-present; **f5**, style type, 1-shorter than stamen, 2-nearly the same level as stamen, 3-longer than stamen; **f6**, number of leaves under first inflorescence; **f7**, number of leaves under second inflorescence; **f8**, flower number in single

inflorescences; **f9**, style length (mm); **f10**, anther number; **f11**, anther length (mm); **f12**, petal number; **f13**, petal length (mm); **f14**, calyx number; **f15**, calyx length (mm). **Fr: fruit**; **fr1**, fruit color, 1-light yellow, 2-yellow, 3-pinkish red, 4-red; **fr2**, flesh color of pericarp, 1-light yellow, 2-yellow, 3-pinkish red, 4-red; **fr3**, fruit apex shape, 1-dent, 2-slightly dent, 3-flat, 4-salient, 5-pointed; **fr5**, fruit shape, 1-flat, 2-oblate, 3-round, 4-high round, 5-prolate round; **fr6**, pubescence on fruit surface, 0-none, 1-sparse, 2-intermediate, 3-dense; **fr7**, fruit weight (g); **fr8**, pericarp thickness (mm); **fr9**, fruit longitudinal diameter (mm); **fr10**, fruit transverse diameter (mm); **fr11**, fruit shape index; **fr12**, locule number; **fr13**, pedicel length from abscission layer (mm); **fr14**, fruit surface furrow, 0-none, 1-little, 2-intermediate, 3-prominent. **S: seed**; **s1**, seed length (mm); **s2**, seed width (mm); **s3**, seed thickness (mm); **s4**, 1000-seeds weight (g).
