# Supplementary material
Source: MDPI journal article supplement (https://www.mdpi.com/2311-7524/9/1/34)
Supplement: s1 [file s1 › 2022-10-08 Table S3.pdf]

**Table S3 Inheritance trend of each phenotypic trait in F<sub>1</sub> (e9292×LA1585) generation**

| Number | Phenotypes | e9292 (♀)                | LA1585(♂)                | F <sub>1</sub>           | Inheritance trend in F <sub>1</sub> |
|--------|------------|--------------------------|--------------------------|--------------------------|-------------------------------------|
| 001    | p1         | half vine                | vine                     | vine                     | W                                   |
| 002    | p2         | determinate              | indeterminate            | indeterminate            | W                                   |
| 003    | l1         | bipinnate compound leaf  | pinnately compound leaf  | bipinnate compound leaf  | C                                   |
| 004    | l2         | drooping                 | horizontal               | horizontal               | W                                   |
| 005    | l3         | green                    | green                    | green                    | N                                   |
| 006    | l4         | transparent              | transparent              | transparent              | N                                   |
| 007    | l5         | divided                  | lobate                   | parted                   | M                                   |
| 008    | gh         | thin and short           | thin and short           | thin and short           | M                                   |
| 009    | f5         | shorter than anther cone | longer than anther cone  | longer than anther cone  | W                                   |
| 010    | f2         | none                     | none                     | none                     | N                                   |
| 011    | f4         | present                  | present                  | present                  | N                                   |
| 012    | f3         | yellow                   | yellow                   | yellow                   | N                                   |
| 013    | f1         | uniparous                | uniparous                | uniparous                | N                                   |
| 014    | fr6        | none                     | intermediate             | intermediate             | W                                   |
| 015    | fr3        | salient                  | flat                     | flat                     | W                                   |
| 016    | fr2        | yellow                   | red                      | red                      | W                                   |
| 017    | fr1        | yellow                   | red                      | red                      | W                                   |
| 018    | fr5        | high round               | round                    | round                    | W                                   |
| 019    | fr14       | shallow                  | none                     | none                     | W                                   |
| 020    | p3 (cm)    | 67.43±3.29 <sup>b</sup>  | 185.58±6.52 <sup>a</sup> | 188.10±8.23 <sup>a</sup> | W                                   |
| 021    | p4 (mm)    | 10.69±0.53 <sup>c</sup>  | 13.45±0.19 <sup>a</sup>  | 12.01±0.46 <sup>b</sup>  | M                                   |
| 022    | l6 (mm)    | 62.74±2.94 <sup>a</sup>  | 46.82±2.78 <sup>b</sup>  | 45.20±2.05 <sup>b</sup>  | W                                   |
| 023    | l7 (mm)    | 66.97±4.19 <sup>a</sup>  | 37.00±5.51 <sup>b</sup>  | 42.09±1.66 <sup>b</sup>  | W                                   |
| 024    | f6         | 7.20±0.84 <sup>a</sup>   | 4.20±0.45 <sup>b</sup>   | 7.80±0.45 <sup>a</sup>   | C                                   |
| 025    | f7         | 9.00±0.71 <sup>b</sup>   | 7.60±0.55 <sup>c</sup>   | 10.80±0.45 <sup>a</sup>  | C                                   |
| 026    | f8         | 9.80±0.84 <sup>b</sup>   | 11.80±0.84 <sup>a</sup>  | 9.00±0.00 <sup>b</sup>   | C                                   |
| 027    | f9 (mm)    | 5.76±0.44 <sup>c</sup>   | 12.32±0.51 <sup>a</sup>  | 8.47±0.47 <sup>b</sup>   | M                                   |
| 028    | f10        | 5.20±0.45 <sup>a</sup>   | 5.00±0.00 <sup>a</sup>   | 5.00±0.00 <sup>a</sup>   | W                                   |
| 029    | f11 (mm)   | 9.31±0.86 <sup>a</sup>   | 8.70±0.55 <sup>ab</sup>  | 8.04±0.14 <sup>b</sup>   | W                                   |
| 030    | f12        | 5.20±0.45 <sup>a</sup>   | 5.00±0.00 <sup>a</sup>   | 5.00±0.00 <sup>a</sup>   | W                                   |
| 031    | f13 (mm)   | 14.76±1.95 <sup>b</sup>  | 18.75±0.79 <sup>a</sup>  | 12.97±0.53 <sup>c</sup>  | C                                   |
| 032    | f14        | 5.20±0.45 <sup>a</sup>   | 5.00±0.00 <sup>a</sup>   | 5.00±0.00 <sup>a</sup>   | W                                   |
| 033    | f15 (mm)   | 10.72±2.56 <sup>a</sup>  | 6.34±0.15 <sup>b</sup>   | 6.71±0.15 <sup>b</sup>   | W                                   |
| 034    | fr7 (g)    | 42.25±6.42 <sup>a</sup>  | 1.23±0.07 <sup>c</sup>   | 6.53±0.70 <sup>b</sup>   | M                                   |
| 035    | fr8 (mm)   | 6.41±0.87 <sup>a</sup>   | 1.21±0.08 <sup>c</sup>   | 3.25±0.08 <sup>b</sup>   | M                                   |
| 036    | fr9 (mm)   | 45.98±2.75 <sup>a</sup>  | 12.34±0.57 <sup>c</sup>  | 22.5±1.19 <sup>b</sup>   | M                                   |
| 037    | fr10 (mm)  | 42.10±3.33 <sup>a</sup>  | 13.57±0.29 <sup>c</sup>  | 22.94±1.08 <sup>b</sup>  | M                                   |

|     |           |                        |                        |                         |   |
|-----|-----------|------------------------|------------------------|-------------------------|---|
| 038 | fr11      | 1.10±0.10 <sup>a</sup> | 0.91±0.03 <sup>b</sup> | 0.98±0.03 <sup>b</sup>  | W |
| 039 | fr12      | 2.60±0.55 <sup>a</sup> | 2.00±0.00 <sup>b</sup> | 2.00±0.00 <sup>b</sup>  | W |
| 040 | fr13 (mm) | 9.69±0.40 <sup>b</sup> | 9.17±0.43 <sup>c</sup> | 11.81±0.12 <sup>a</sup> | C |
| 041 | s1 (mm)   | 3.80±0.06 <sup>a</sup> | 3.37±0.09 <sup>b</sup> | 2.94±0.08 <sup>c</sup>  | W |
| 042 | s2 (mm)   | 2.86±0.03 <sup>a</sup> | 2.09±0.04 <sup>c</sup> | 2.17±0.08 <sup>b</sup>  | M |
| 043 | s3 (mm)   | 0.76±0.02 <sup>a</sup> | 0.59±0.01 <sup>b</sup> | 0.61±0.03 <sup>b</sup>  | W |
| 044 | s4 (g)    | 2.89±0.06 <sup>a</sup> | 0.94±0.03 <sup>c</sup> | 2.02±0.05 <sup>b</sup>  | M |

**Note:** The qualitative traits were determined from the ten independent observations for each tomato organs or plant type. The figures involved quantitative traits were derived from the ten biological replicates in the table, and presented into mean ± sd (standard deviation, n=10), the small letters on upper right corner of data indicate the statistical significance at  $P<0.05$  level by Duncan's test, while the capital letters in the rightmost column indicate tomato with different genetic backgrounds, and **W** was assigned to wild tomato LA1585, **C** was assigned to cultivated tomato e9292, **M** means the mid-type of LA1585 and e9292, **N** means non-polymorphic phenotypes, and listed at yellow highlighted lines.

**P: plant:** p1, plant type, 1-vine, 2- semi-vine, 3-straight; **p2**, growth type, 1-indeterminate, 2-determinate; **p3**, plant height (cm); **p4**, stem diameter (mm). **L, leaves:** L1, leaf shape, 1- simple odd-pinnately compound leaf, 2- bipinnate odd-pinnately compound leaf; **L2**, leaf attitude, 1-semi-erect, 2-horizontal, 3-drooping; **L3**, leaf color, 1-yellow green, 2-pale green, 3-green, 4-deep green; **L4**, leaf vein color, 0-clear, 1-purple, 2-green; **L5**, leaf division, 0-none, 1- lobate, 3- parted, 4- divided; **L6**, leaf length (cm); **L7**, leaf width (cm); **gh**, glandular hairs on the leaves or steams, 0-none, 1-thin short, 2-thick short, 3-thin long, 4-thick long. **F: flower:** f1, inflorescence type, 1-solitary flower, 2-generally uniparous, 3-both partly uniparous and multiparous, 4- generally multiparous; **f2**, flower cluster, 0-absent, 1-present; **f3**, corolla color, 1-light yellow, 2-yellow, 3-orange; **f4** pedicel abscission layer, 0-absent, 1-present; **f5**, style type, 1-shorter than stamen, 2-nearly the same level as stamen, 3-longer than stamen; **f6**, number of leaves under first inflorescence; **f7**, number of leaves under second inflorescence; **f8**, flower number in single inflorescences; **f9**, style length (mm); **f10**, anther number; **f11**, anther length (mm); **f12**, petal number; **f13**, petal length (mm); **f14**, calyx number; **f15**, calyx length (mm). **Fr: fruit:** fr1, fruit color, 1-light yellow, 2-yellow, 3-pinkish red, 4-red; **fr2**, flesh color of pericarp, 1-light yellow, 2-yellow, 3-pinkish red, 4-red; **fr3**, fruit apex shape, 1-dent, 2-slightly dent, 3-flat, 4-salient, 5-pointed; **fr5**, fruit shape, 1-flat, 2-oblate, 3-round, 4-high round, 5-prolate round; **fr6**, pubescence on fruit surface, 0-none, 1-sparse, 2-intermediate, 3-dense; **fr7**, fruit weight (g); **fr8**, pericarp thickness (mm); **fr9**, fruit longitudinal diameter (mm); **fr10**, fruit transverse diameter (mm); **fr11**, fruit shape index; **fr12**, locule number; **fr13**, pedicel length from abscission layer (mm); **fr14**, fruit surface furrow, 0-none, 1-little, 2-intermediate, 3-prominent. **S: seed:** s1, seed length (mm); **s2**, seed width (mm); **s3**, seed thickness (mm); **s4**, 1000-seeds weight (g).
