# Supplementary material
Source: MDPI journal article supplement (https://www.mdpi.com/2311-7524/9/1/34)
Supplement: s1 [file s1 › 2022-10-09 Table S4.pdf]

**Table S4 Effect of root growth resulted from NaCl and mannitol in six genotype tomatoes**

| Treatment          | Days | e9292          | LA1585         | F <sub>1</sub>  | F <sub>2</sub> -226 | F <sub>2</sub> -299 | F <sub>2</sub> -332 |
|--------------------|------|----------------|----------------|-----------------|---------------------|---------------------|---------------------|
| 50 mM<br>NaCl      | 1    | -2.571±0.385E  | 0.914±0.077C   | -0.989±0.252D   | 5.319±1.063A        | 2.621±0.358B        | 3.339±0.408B        |
|                    | 2    | -3.079±0.554D  | 10.949±1.889B  | -4.515±1.239D   | 6.857±2.704C        | 17.328±0.920A       | 5.795±0.492C        |
|                    | 3    | 4.701±1.235C   | 4.272±0.165C   | -3.151±0.236D   | 11.060±1.162B       | 22.944±2.407A       | 5.215±0.523C        |
|                    | 4    | 2.049±0.106C   | 12.195±3.425B  | 0.556±0.184C    | 20.104±2.800A       | 8.672±2.092B        | 7.166±0.733B        |
|                    | 5    | 10.262±4.097C  | 30.174±1.282A  | 9.630±2.462C    | 20.568±7.427B       | 5.100±1.473C        | 0.830±0.311C        |
|                    | 6    | 14.535±4.109B  | 24.449±0.903A  | 7.938±2.471BC   | 10.852±2.462BC      | 4.500±2.236C        | -5.355±2.073D       |
| 100 mM<br>NaCl     | 1    | -2.403±0.694D  | 1.177±0.361B   | 2.106±0.162B    | 4.051±0.702A        | 1.614±0.387B        | -0.829±0.114C       |
|                    | 2    | -5.347±1.129D  | 2.891±0.845B   | 1.565±0.704C    | 5.500±1.070BC       | 9.498±2.209A        | -2.815±0.351D       |
|                    | 3    | -4.891±0.882C  | 4.523±0.435B   | 3.887±0.129B    | 16.922±3.670A       | 6.862±0.001B        | -8.359±0.228C       |
|                    | 4    | -1.592±0.218D  | 7.267±1.341B   | 2.612±0.757C    | 15.878±1.380A       | -2.313±1.749D       | -17.643±2.573E      |
|                    | 5    | -6.117±2.293CD | 14.616±0.574B  | -3.984±0.253C   | 25.399±1.339A       | -12.484±5.768D      | -26.837±3.315E      |
|                    | 6    | -4.159±2.785C  | 10.614±2.108B  | 7.842±2.077B    | 18.685±3.234A       | 5.020±0.690B        | -31.427±0.785D      |
| 150 mM<br>NaCl     | 1    | -4.573±0.581D  | -4.412±0.251D  | -2.702±0.610C   | 1.634±0.246A        | 0.759±0.197A        | -1.029±0.148B       |
|                    | 2    | -6.265±0.616D  | -7.053±0.917D  | -6.679±0.241D   | -1.372±0.540B       | 4.360±0.023A        | -2.979±0.509C       |
|                    | 3    | -7.08±0.889B   | -10.932±1.033C | -12.997±0.818C  | -3.255±0.157A       | -3.902±0.870A       | -4.848±1.126A       |
|                    | 4    | -5.329±0.293A  | -9.470±1.106B  | -16.049±0.804D  | -4.300±1.412A       | -13.603±0.629C      | -17.628±0.969D      |
|                    | 5    | -7.760±0.337B  | -9.859±2.119B  | -30.308±1.218CD | -4.011±0.028A       | -33.120±2.713D      | -27.474±0.285C      |
|                    | 6    | -8.802±1.687C  | -2.268±0.682B  | -35.420±4.274E  | 5.103±0.610A        | -25.765±2.206D      | -31.218±0.297E      |
| 50 mM<br>mannitol  | 1    | 5.150±1.355A   | 3.485±0.849A   | -0.1906±0.037B  | 3.711±0.568A        | 4.785±1.114A        | 0.301±0.028B        |
|                    | 2    | 6.061±0.534BC  | 3.166±1.843CD  | 0.720±0.033D    | 14.235±0.036A       | 5.225±1.910BC       | 6.837±0.616B        |
|                    | 3    | 13.957±0.364B  | -1.303±0.725D  | 1.473±0.362E    | 25.392±2.139A       | 14.984±0.709B       | 7.111±1.028C        |
|                    | 4    | 19.237±1.540B  | 8.203±0.955D   | 4.580±1.273D    | 31.805±1.936A       | 12.988±2.926C       | -5.323±1.970E       |
|                    | 5    | 10.579±4.639B  | 11.322±0.702B  | -7.049±1.129D   | 20.853±0.248A       | -1.938±0.625C       | -16.256±1.088E      |
|                    | 6    | 8.226±1.675B   | 3.624±0.245C   | -7.254±0.550E   | 13.959±1.045A       | 0.731±0.220D        | -25.259±0.564F      |
| 100 mM<br>mannitol | 1    | 0.622±0.358B   | -3.958±0.747D  | -0.759±0.346C   | 3.968±0.833A        | 0.187±0.0161BC      | 1.315±0.167B        |
|                    | 2    | 2.762±1.202B   | -4.771±0.558C  | -4.126±0.225C   | 11.173±0.05A        | 2.432±0.316B        | 2.222±0.194B        |
|                    | 3    | 1.828±0.510B   | -9.730±0.225D  | -10.260±0.101D  | 17.760±0.480A       | 2.850±0.813B        | -1.548±0.033C       |
|                    | 4    | 2.832±0.670B   | -13.167±0.494D | -9.098±0.850C   | 35.103±0.019A       | -15.940±1.927E      | -9.877±0.698C       |
|                    | 5    | -2.016±0.176C  | 7.182±0.506B   | -24.730±0.918F  | 27.523±0.186A       | -21.751±1.002E      | -19.729±0.648D      |
|                    | 6    | -6.669±0.328C  | 5.792±0.531B   | -33.367±1.247E  | 26.136±2.787A       | -4.823±0.503C       | -22.857±1.253D      |
| 150 mM<br>mannitol | 1    | -2.489±0.342C  | -6.127±0.954D  | -2.996±0.492C   | 3.411±0.582A        | 0.528±0.021B        | 1.346±0.171B        |
|                    | 2    | -5.008±0.870C  | -10.649±0.179E | -4.368±0.505D   | 4.145±1.008B        | 0.853±0.039C        | 6.223±0.450A        |
|                    | 3    | -3.055±0.928BC | -13.727±1.323E | -9.172±0.449D   | 15.554±2.633A       | -4.634±0.431C       | -0.583±0.190B       |
|                    | 4    | 3.516±0.440B   | -9.588±0.230C  | -11.621±0.251C  | 19.781±3.857A       | -11.503±1.304C      | -10.002±0.816C      |
|                    | 5    | -9.256±2.100B  | -6.805±1.655B  | -27.594±0.843D  | 19.874±2.103A       | -20.573±1.170C      | -23.244±1.076C      |
|                    | 6    | -10.247±1.761C | -4.505±0.097B  | -36.797±1.137E  | 26.039±1.082A       | -5.343±0.417B       | -29.003±0.103D      |

Note: the value=root length under treatment-root length of control (mean ±sd )in the table. Capital letters indicate statistical

significance at P < 0.01 by Duncan's test (n=5).
