# Supplementary material
Source: MDPI journal article supplement (https://www.mdpi.com/2311-7524/9/1/34)
Supplement: s1 [file s1 › 2022-10-09 Table S5.pdf]

**Table S5 Effect of hypocotyl elongation resulted from NaCl and mannitol in six tomatoes**

| Treatment          | Days | <i>e9292</i>    | LA1585          | F <sub>1</sub> | F <sub>2</sub> -226 | F <sub>2</sub> -299 | F <sub>2</sub> -332 |
|--------------------|------|-----------------|-----------------|----------------|---------------------|---------------------|---------------------|
| 50 mM<br>Nacl      | 1    | -2.610±0.1650C  | -2.570±0.556C   | 1.482±0.234A   | -1.924±0.499BC      | 2.197±0.643A        | -1.333±0.092B       |
|                    | 2    | -5.126±0.168E   | -3.842±0.099D   | -0.255±0.087B  | -1.056±0.454C       | 6.863±0.227A        | -3.599±0.095D       |
|                    | 3    | -8.544±0.493D   | -2.606±0.107C   | 5.281±1.188B   | -5.590±2.000D       | 10.155±1.485A       | -1.382±0.833C       |
|                    | 4    | -13.428±0.279D  | -4.892±0.560C   | 4.662±1.641B   | -2.462±0.985C       | 8.201±2.138A        | -2.532±0.137C       |
|                    | 5    | -16.816±0.430D  | -7.782±0.632BC  | -2.792±0.284A  | -8.838±2.462C       | -5.315±1.633AB      | -2.725±0.437A       |
|                    | 6    | -17.363±0.276C  | -5.632±0.235A   | -12.067±0.974B | -14.415±2.247BC     | -6.508±1.645A       | -3.961±0.379A       |
| 100 mM<br>Nacl     | 1    | -3.272±0.274C   | -4.063±0.403D   | -1.616±0.172B  | -3.785±0.163CD      | 0.618±0.077A        | -1.703±0.015B       |
|                    | 2    | -6.179±0.837C   | -8.313±0.910D   | -6.951±0.231CD | -3.983±0.723B       | 1.842±0.215A        | -5.993±0.393C       |
|                    | 3    | -12.565±0.500D  | -10.161±0.568C  | -9.328±0.014C  | -5.763±0.630B       | -1.528±0.271A       | -13.287±0.217D      |
|                    | 4    | -15.268±0.864C  | -11.272±0.627B  | -11.011±0.349B | -11.232±1.622B      | -2.940±0.900A       | -15.193±0.479C      |
|                    | 5    | -20.032±0.339C  | -13.551±0.161B  | -20.314±1.835C | -11.573±0.587B      | -9.387±0.485A       | -13.692±0.466B      |
|                    | 6    | -24.906±1.170D  | -12.161±0.500A  | -22.979±0.392C | -15.724±0.124B      | -12.034±0.786A      | -16.442±0.397B      |
| 150 mM<br>Nacl     | 1    | -4.086±0.257C   | -5.367±0.047D   | -1.968±0.067B  | -4.207±0.026C       | 1.615±0.074A        | 1.521±0.304A        |
|                    | 2    | -7.828±0.611C   | -12.085±0.197D  | -8.420±0.387C  | -6.676±0.363B       | 2.667±0.111A        | -6.387±0.058B       |
|                    | 3    | -12.901±0.106BC | -14.474±0.198D  | -12.393±0.471B | -15.412±0.498E      | 3.390±0.268A        | -13.259±0.219C      |
|                    | 4    | -19.800±0.787C  | -16.380±0.178B  | -20.193±0.812C | -23.508±0.298D      | -5.580±0.329A       | -15.752±0.320B      |
|                    | 5    | -25.804±1.123E  | -14.833±0.401B  | -18.668±0.164F | -22.594±0.757D      | -12.185±0.362A      | -18.441±0.761C      |
|                    | 6    | -33.229±1.627D  | -14.150±0.556AB | -39.650±0.328E | -29.347±0.0780C     | -13.244±0.071A      | -15.337±0.200B      |
| 50 mM<br>mannitol  | 1    | -1.610±0.040C   | -3.451±0.036D   | 1.519±0.146A   | -1.511±0.265C       | 1.304±0.362A        | -0.911±0.079B       |
|                    | 2    | -2.200±0.297C   | -7.041±0.339E   | -4.662±0.630D  | -0.832±0.193B       | 3.364±0.058A        | -4.741±0.169D       |
|                    | 3    | -4.785±0.068BC  | -6.081±0.777CD  | -6.783±0.997D  | -3.497±0.942B       | 5.791±0.140A        | -5.780±0.322CD      |
|                    | 4    | -13.641±0.367E  | -1.787±0.892B   | -11.263±0.628D | 3.372±0.567A        | 4.379±1.237A        | -4.426±0.003C       |
|                    | 5    | -18.185±1.382F  | -1.979±1.143C   | -12.756±0.339E | 2.635±0.150B        | 5.043±0.224A        | -4.822±0.722D       |
|                    | 6    | -14583±2.075C   | 3.466±1.262A    | -23.631±1.616D | -5.280±1.210B       | 2.768±0.988A        | -2.644±0.174B       |
| 100 mM<br>mannitol | 1    | -4.255±0.137E   | -4.577±0.236E   | -1.250±0.313C  | -2.882±0.146D       | 1.992±0.211A        | 0.551±0.361B        |
|                    | 2    | -8.864±0.574E   | -9.558±0.248E   | -6.805±0.741D  | -2.727±0.085C       | 3.282±0.099A        | -0.396±0.192B       |
|                    | 3    | -13.525±1.244D  | -13.067±0.309D  | -7.543±1.175C  | -6.644±0.780C       | 0.414±0.096A        | -3.796±0.671B       |
|                    | 4    | -14.288±0.539D  | -12.197±0.720C  | -15.161±0.768D | -11.523±1.228C      | 2.259±0.684A        | -4.123±0.226B       |
|                    | 5    | -23.361±1.944D  | -8.266±1.154B   | -24.012±1.520D | -14.390±0.101C      | -3.069±0.152A       | -6.994±0.021B       |
|                    | 6    | -22.489±1.099D  | -4.438±0.384A   | -34.611±1.673E | -12.980±0.682C      | -8.485±1.111B       | -5.359±0.058A       |
| 150 mM<br>mannitol | 1    | -3.281±0.287C   | -4.429±0.268D   | -1.331±0.060B  | -3.687±0.419C       | 1.336±0.163A        | -1.339±0.284B       |
|                    | 2    | -3.451±0.394B   | -9.762±0.575E   | -5.684±0.127D  | -6.568±0.369D       | 3.336±0.226A        | -4.409±0.337C       |
|                    | 3    | -5.759±0.221B   | -12.541±0.237E  | -10.279±1.056D | -11.544±1.157DE     | 1.546±0.106A        | -7.905±0.769C       |
|                    | 4    | -11.541±0.917BC | -12.985±0.775C  | -19.012±1.930D | -13.442±0.303C      | -3.491±0.203A       | -9.492±0.303B       |
|                    | 5    | -22.601±0.416B  | -11.192±0.742A  | -28.871±1.841C | -10.787±0.124A      | -10.704±0.465A      | -10.909±0.327A      |
|                    | 6    | -27.884±1.423C  | -9.498±0.362A   | -38.925±1.360D | -13.795±0.806B      | -12.092±0.228B      | -13.236±0.646B      |

Note: The value= hypocotyl length under treatment- hypocotyl length of control (mean ±sd) in the table. Capital letters indicate

statistical significance at P < 0.01 by Duncan's test (n=5).
