# Supplementary material
Source: MDPI journal article supplement (https://www.mdpi.com/2311-7524/9/1/34)
Supplement: s1 [file s1 › Figure S1 legend.pdf]

**Figure S1 Pathway of lycopene biosynthesis and degradation in tomato.**

Orange highlight indicate enzyme-coding genes having selected from both 2-C-methyl-D-erythritol 4-phosphate (MEP) and carotenoid synthesis (CBP)

**MEP** pathway. **Componets:** *DMAPP*, dimethylallyl diphosphate, C5; *G3P*, D-Glyceraldehyde 3-phosphate; *GGPP*, Geranylgeranyl diphosphate, C20; *HMBPP*, 4-Hydroxy-3-methylbut-2-enyl-diphosphate; *IPP*, Isopentenyl diphosphate, C5; *MEP*, 2-C-Methyl-D-erythritol 4-phosphate; *Pyruvate*, 1-Deoxy-D-xylulose 5-phosphate. **Enzymes/genes :** *CMK*, 4-(Cytidine 5-diphospho)-2-C-methyl-D-erythritol kinase; *DXS*, 1-Deoxy-D-xylulose 5-phosphate synthase; *DXR*, 1-Deoxy-D-xylulose 5-phosphate reductoisomerase; *GGPPS*, Geranylgeranyl diphosphate synthase; *HDR*, 4-Hydroxy-3-methylbut-2-enyl diphosphate reductase; *HDS*, 4-Hydroxy-3-methylbut-2-enyl-diphosphate synthase; *IDI*, Isopentenyl diphosphate  $\Delta$ -isomerase; *MCT*, 2-C-methyl-D-erythritol 4-phosphate cytidylyltransferase; *MDS*, 2-C-methyl-D-erythritol 2,4-cyclodiphosphate synthase.

**CBP** pathway, **Enzymes/genes:** *CRTISO*, carotenoid isomerase; *LCYB/CYCB*, lycopene  $\beta$ -cyclase; *LCYE*, lycopene  $\varepsilon$ -cyclase; *PDS*, phytoene desaturase; *PSY*, phytoene synthase; *ZDS*,  $\zeta$ -carotene desaturase; *ZISO*,  $\zeta$ -carotene isomerase.
