# Supplementary material
Source: MDPI journal article supplement (https://www.mdpi.com/2311-7524/9/1/34)

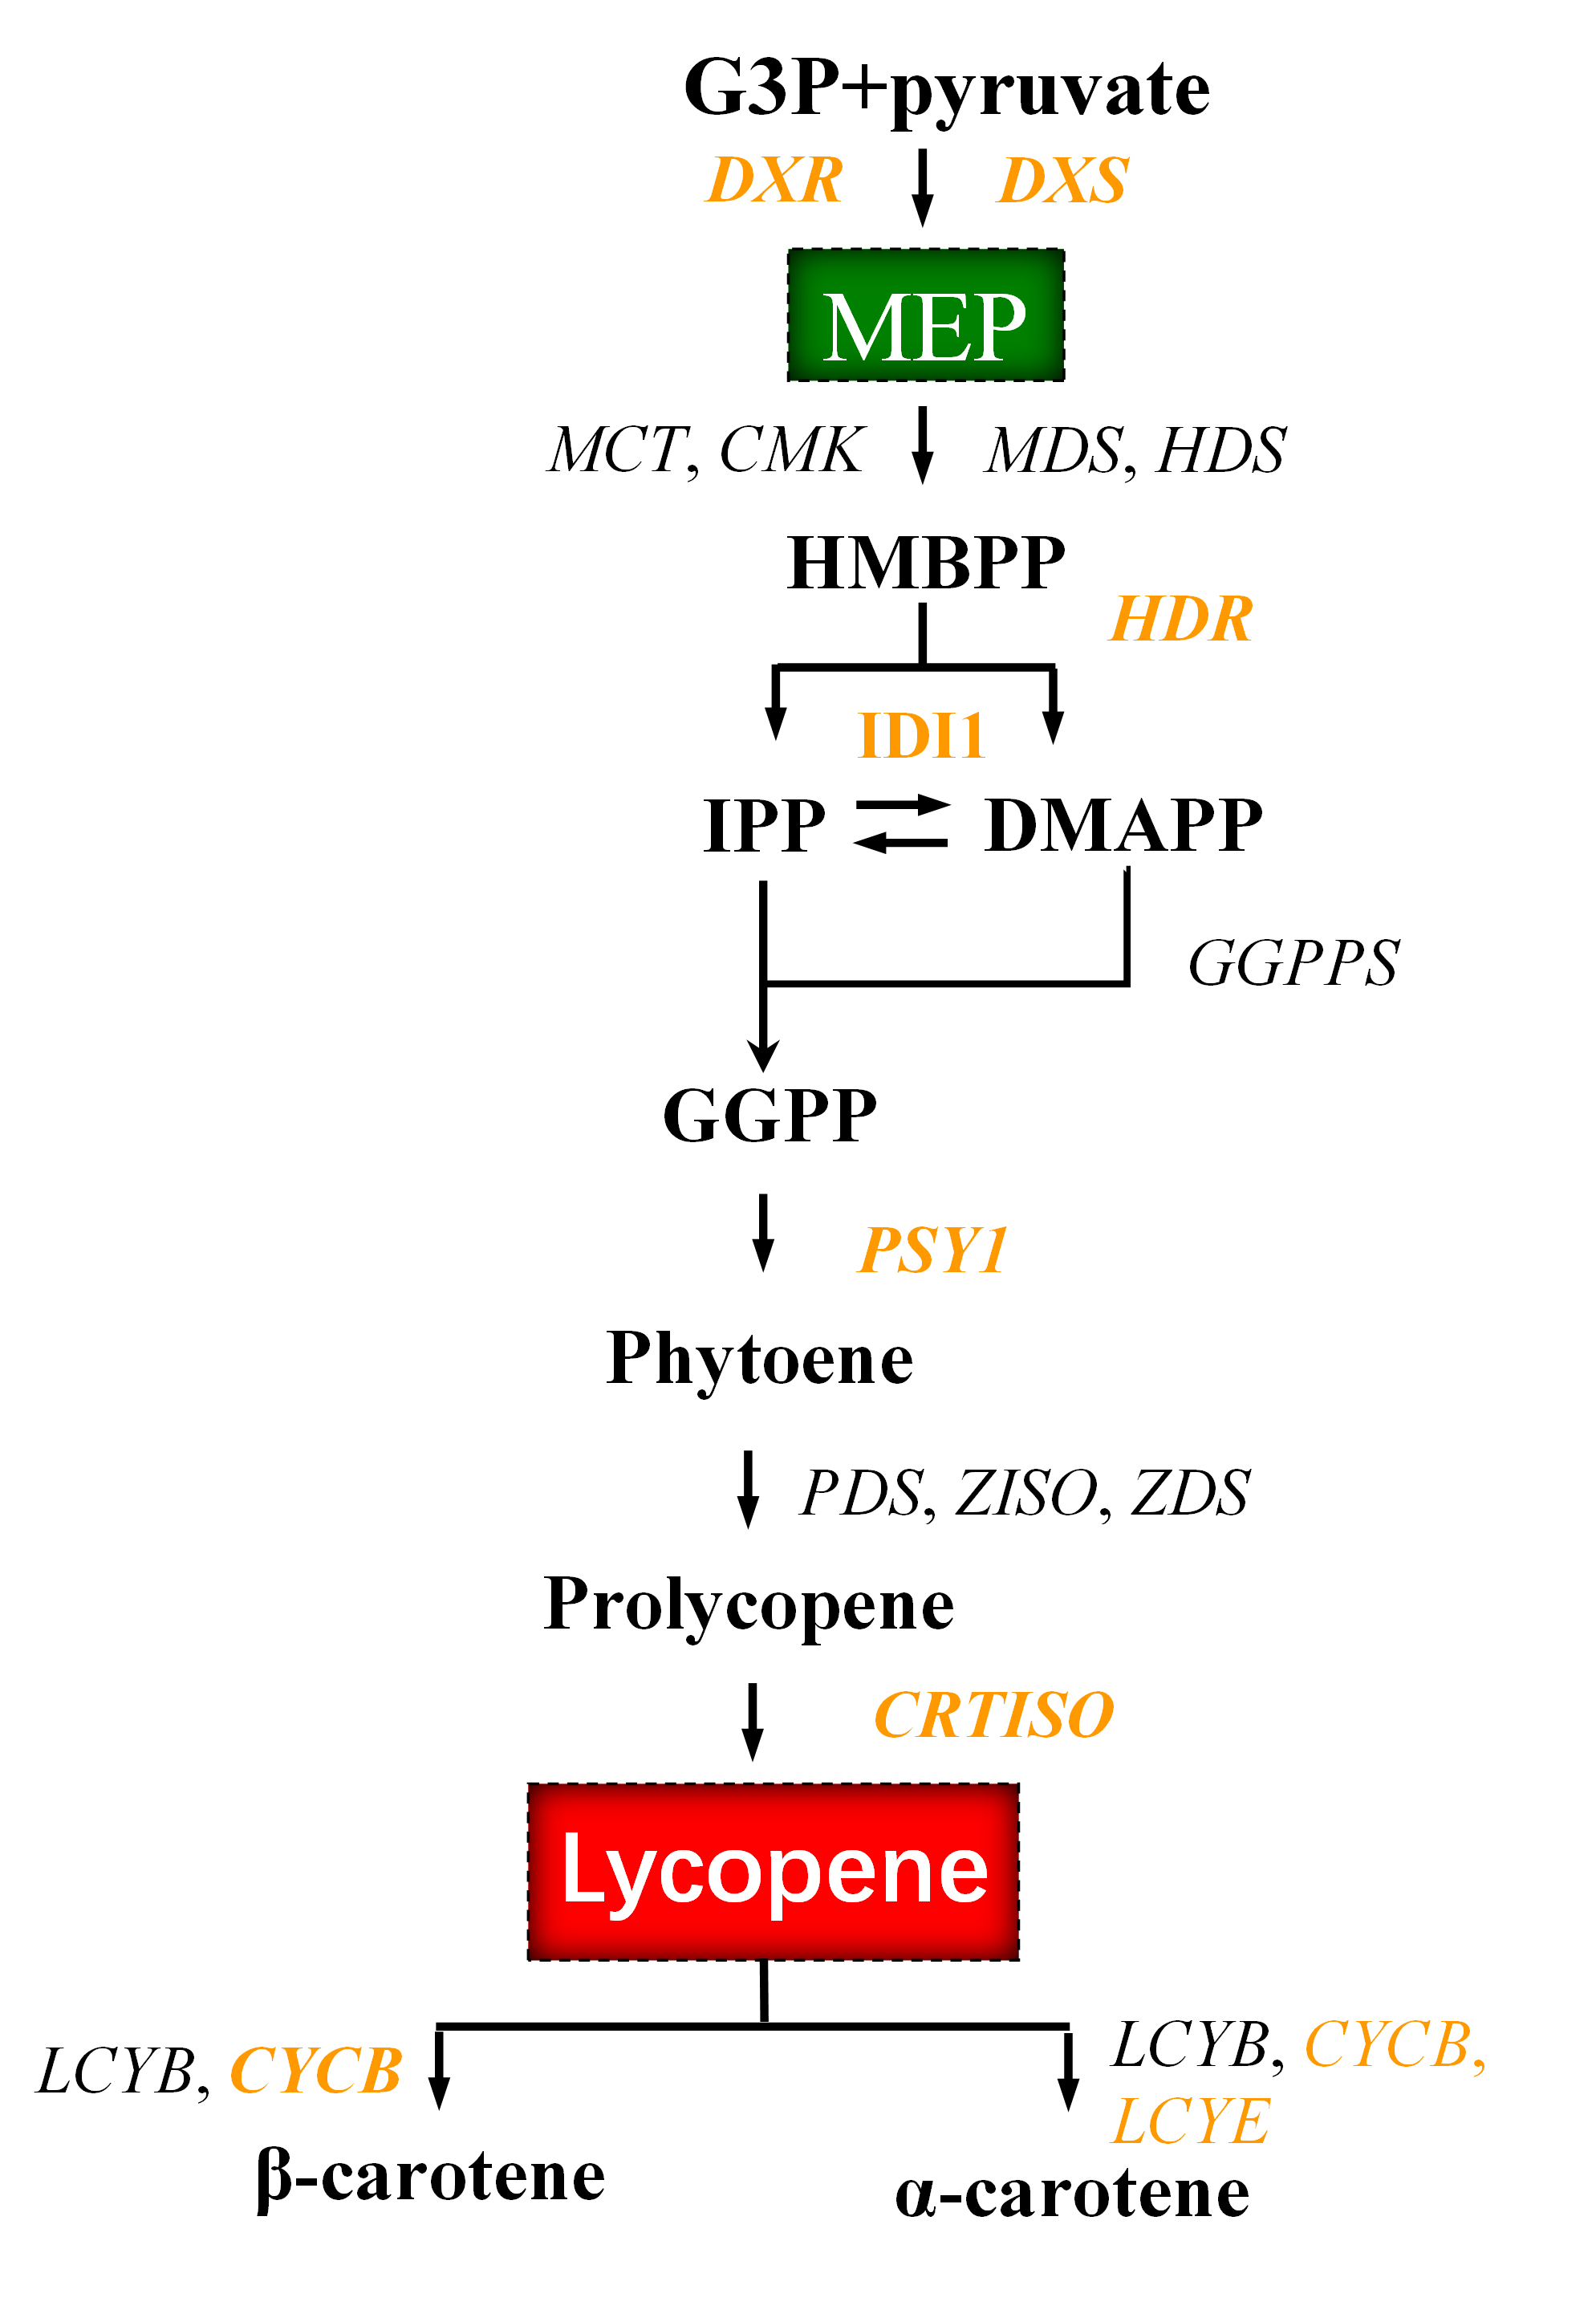

Supplement: s1 [file s1 › Figure S1.jpg]
